# Supplementary material for: Risk of serious COVID-19 outcomes among adults and children with moderate-to-severe asthma: a systematic review and meta-analysis
Source: PubMed Central journal article supplement — Eur Respir Rev. 2022 Nov 2;31(166):220066. doi: 10.1183/16000617.0066-2022 (PMC9724896; doi:10.1183/16000617.0066-2022), 2022-11-02

## Supplementary document

### List of Tables and Figures

**Table E1. Search strategy**

**Table E2. Demographic characteristics of the included studies (n=12)**

**Table E3. Markers of asthma severity of the included studies (n=12)**

**Table E4. JBI quality assessment of the included studies (n=12)**

**Table E5. Covariates adjusted in a statistical model for estimates used in this review**

**Figure E1. Adjusted odds ratios (ORs) for hospitalisation for COVID-19**

**Figure E2. Adjusted odds ratios (ORs) for mortality for COVID-19**

**Figure E3. Adjusted odds ratio (ORs) for ICU admission for COVID-19**

**Table E1. Search strategy**

| Database                  | Ovid MEDLINE(R) and Epub Ahead of Print, In-Process, In-Data-Review & Other Non-Indexed Citations, Daily and Versions(R) <1946 to 14 January, 2022>.                                                                                                                                                                                                                                                                                                                                                                                                                                                                                                                                                                                                                                                                                                                                                                                                                                                                                                                                                                                                                                                                                    |          |          |
|---------------------------|-----------------------------------------------------------------------------------------------------------------------------------------------------------------------------------------------------------------------------------------------------------------------------------------------------------------------------------------------------------------------------------------------------------------------------------------------------------------------------------------------------------------------------------------------------------------------------------------------------------------------------------------------------------------------------------------------------------------------------------------------------------------------------------------------------------------------------------------------------------------------------------------------------------------------------------------------------------------------------------------------------------------------------------------------------------------------------------------------------------------------------------------------------------------------------------------------------------------------------------------|----------|----------|
| <b>Date of search</b>     | 20210719                                                                                                                                                                                                                                                                                                                                                                                                                                                                                                                                                                                                                                                                                                                                                                                                                                                                                                                                                                                                                                                                                                                                                                                                                                | 20210923 | 20220118 |
| <b>Search history</b>     | 1 Coronavirus/ or Betacoronavirus/ or Coronavirus Infections/ or COVID-19/ or SARS-CoV-2/ (99842)<br>2 coronavirus*.ti,ab,kw,kf.<br>3 ("COVID-19*" or COVID19* or "COVID-2019*" or covid).ti,ab,kw,kf.<br>4 1 or 2 or 3<br>5 exp Asthma/<br>6 asthma*.ti,ab,kw.<br>7 5 or 6<br>8 4 and 7<br>9 (201912* or 2020* or 2021* or 2022*).ed.<br>10 8 and 9<br>11 Meta-Analysis as Topic/<br>12 meta analy\$.tw.<br>13 metaanaly\$.tw.<br>14 Meta-Analysis/<br>15 (systematic adj (review\$1 or overview\$1)).tw.<br>16 exp Review Literature as Topic/<br>17 or/11-16<br>18 cochrane.ab.<br>19 embase.ab.<br>20 (psychlit or psyclit).ab.<br>21 (psychinfo or psycinfo).ab.<br>22 (cinahl or cinhal).ab<br>23 science citation index.ab.<br>24 bids.ab.<br>25 cancerlit.ab.<br>26 or/18-25<br>27 reference list\$.ab.<br>28 bibliograph\$.ab.<br>29 hand-search\$.ab.<br>30 relevant journals.ab.<br>31 manual search\$.ab.<br>32 or/27-31<br>33 selection criteria.ab.<br>34 data extraction.ab.<br>35 33 or 34<br>36 Review/<br>37 35 and 36<br>38 Comment/<br>39 Letter/<br>40 Editorial/<br>41 animal/<br>42 human/<br>43 41 not (41 and 42)<br>44 or/38-40,43<br>45 17 or 26 or 32 or 37<br>46 45 not 44<br>47 10 and 46<br>48 10 not 47 |          |          |
| <b>Number of results</b>  | 624                                                                                                                                                                                                                                                                                                                                                                                                                                                                                                                                                                                                                                                                                                                                                                                                                                                                                                                                                                                                                                                                                                                                                                                                                                     | 110      | 168      |
| <b>Systematic reviews</b> | 21                                                                                                                                                                                                                                                                                                                                                                                                                                                                                                                                                                                                                                                                                                                                                                                                                                                                                                                                                                                                                                                                                                                                                                                                                                      | 2        | 5        |
| <b>Others</b>             | 603                                                                                                                                                                                                                                                                                                                                                                                                                                                                                                                                                                                                                                                                                                                                                                                                                                                                                                                                                                                                                                                                                                                                                                                                                                     | 108      | 163      |
| Database                  | WHO Covid literature database                                                                                                                                                                                                                                                                                                                                                                                                                                                                                                                                                                                                                                                                                                                                                                                                                                                                                                                                                                                                                                                                                                                                                                                                           |          |          |
| <b>Date of search</b>     | 20210719                                                                                                                                                                                                                                                                                                                                                                                                                                                                                                                                                                                                                                                                                                                                                                                                                                                                                                                                                                                                                                                                                                                                                                                                                                | 20210923 | 20220118 |
| <b>Search history</b>     | (tw:(asthma))<br>Sub set to identify SRs:<br>(tw:(("systematic review" or "meta analy*" or metaanaly* or meta-analys* or "rapid review" or "evidence summary" or "evidence synthesis")))                                                                                                                                                                                                                                                                                                                                                                                                                                                                                                                                                                                                                                                                                                                                                                                                                                                                                                                                                                                                                                                |          |          |
| <b>Number of results</b>  | 1836                                                                                                                                                                                                                                                                                                                                                                                                                                                                                                                                                                                                                                                                                                                                                                                                                                                                                                                                                                                                                                                                                                                                                                                                                                    | 270      | 575      |

|                           |                                                                                                                                                                                                                                                                                                                                                                                      |          |          |
|---------------------------|--------------------------------------------------------------------------------------------------------------------------------------------------------------------------------------------------------------------------------------------------------------------------------------------------------------------------------------------------------------------------------------|----------|----------|
| <b>Systematic reviews</b> | 47                                                                                                                                                                                                                                                                                                                                                                                   | 7        | 16       |
| <b>Others</b>             | 1789                                                                                                                                                                                                                                                                                                                                                                                 | 263      | 559      |
| <b>Database</b>           | <b>Medrxivr (<a href="https://mcguinlu.shinyapps.io/medrxivr/">https://mcguinlu.shinyapps.io/medrxivr/</a>)</b>                                                                                                                                                                                                                                                                      |          |          |
| <b>Date of search</b>     | 20210719                                                                                                                                                                                                                                                                                                                                                                             | 20210923 | 20220118 |
| <b>Search history</b>     | 2019nCoV<br>Betacoronavirus<br>Corona Virus<br>Coronavirus<br>Coronavirus<br>\\bCoV\\b<br>\\bCoV2\\b<br>COVID<br>HCoV-19<br>\\bnCoV\\b<br>SARS CoV 2<br>SARS2<br>SARSCoV<br>SARS-CoV<br><br>[Aa]sthma<br><br>Sub set to identify SRs:<br>[Ss]systematic review<br>[Mm]eta analy<br>[Mm]etaanaly<br>[Mm]eta-analys<br>[Rr]apid review<br>[Ee]vidence summary<br>[Ee]vidence synthesis |          |          |
| <b>Number of results</b>  | 90                                                                                                                                                                                                                                                                                                                                                                                   | 7        | 2        |
| <b>Systematic reviews</b> | 4                                                                                                                                                                                                                                                                                                                                                                                    | 1        | 0        |
| <b>Others</b>             | 86                                                                                                                                                                                                                                                                                                                                                                                   | 6        | 2        |

Note: Searches were updated on 23 September 2021 and 18 January 2022. 1. Ovid MEDLINE(R): Date of search 20210923 with entry date limit applied to prior search [(2021072\* or 2021073\* or 202108\* or 202109\*).ed.], date of search 20220118 on database segment <1946 to January 14, 2022> with entry date limit applied to prior search ed=20210924-20220117. Entry date limit in line 9 (to focus on Covid-19 pandemic period) edited to allow additions from 2022; WHO COVID literature database: Date of search 20210923 with entry date limit applied to prior search [entry\_date:(2021072\* or 2021073\* or 202108\* or 202109\*)] , Date of search 20220118 with entry date limit applied to prior search [(entry\_date:(2021092\* or 20211\* or 2022\*))]; Medrxivr: Date of search 20210923 with entry date limit applied to prior search [records added from 20 July 2021] . Date of search 20220118 with entry date limit applied to prior search [records added from 24 September 2021].

**Table E2. Demographic characteristics of included studies (n=12)**

|                          | <b>Control group<br/>(N, %)</b>     | <b>Control group with severe COVID-19 outcome cases*</b>            | <b>Severe asthma (N, %)</b> | <b>Severe asthma with severe COVID-19 outcome cases</b>   |
|--------------------------|-------------------------------------|---------------------------------------------------------------------|-----------------------------|-----------------------------------------------------------|
| <b>Aveyard (2021)</b>    | No respiratory disease<br>4,693,447 | Hospitalisation: 3127<br>ICU: 672<br>Death: 1475                    | 385,702                     | Hospitalisation: 1369<br>ICU admission: 124<br>Death: 476 |
| <b>Bloom (2021)</b>      | No asthma<br>7,083                  | Death: 382                                                          | 201                         | Death: 24                                                 |
| <b>Choi (2021)</b>       | Step 1 (mild asthma)<br>51          | ICU admission: 3<br>Death: 5                                        | 4                           | ICU admission: 0<br>Death: 0                              |
| <b>Eger (2020)</b>       | Dutch population<br>13,363,687      | Hospitalisation: 10,691<br>ICU for intubation: 2,673<br>Death 4,009 | 634                         | Hospitalisation: 7<br>ICU for intubation: 5<br>Death: 1   |
| <b>Fong (2021)</b>       | Non-SA <sup>§</sup><br>63           | Death: 32                                                           | 39                          | Death 1                                                   |
| <b>Robinson (2021)</b>   | No asthma <sup>§</sup><br>210       | Hospitalisation: 45<br>Ventilation: 12<br>Death: 9                  | 44                          | Hospitalisation: 14<br>Ventilation: 5<br>Death: 0         |
| <b>Schultze (2020)</b>   | SABA only:<br>108,411               | SABA only<br>Death: 49 (0.05%)                                      | 101,077                     | Death: 105                                                |
| <b>Williamson (2020)</b> | With no recent OCS use<br>2,454,403 | Death: 1,211                                                        | 291,670                     | Death: 335                                                |
| <b>Jung (2021)</b>       | No asthma<br>3,704                  | Death: 108                                                          | 40                          | Death: 4                                                  |
| <b>aShi (2022)</b>       | No asthma<br>39,518                 | Hospitalisation: 366                                                | 965                         | Hospitalisation: 15                                       |
| <b>bShi (2022)</b>       | No asthma<br>215,345                | Hospitalisation: 21,487<br>ICU admission: 1,679<br>Death: 7,875     | 9,154                       | Hospitalisation: 1,464<br>ICU admission: 85<br>Death: 450 |
| <b>Zein (2022)</b>       | No asthma<br>62,042                 | Hospitalisation: NA<br>ICU admission: NA<br>Death: NA               | 290                         | Hospitalisation: NA<br>ICU admission: NA<br>Death: NA     |

NA, Not available; SD, Standard deviation; IQR, Interquartile range; SA, Severe asthma; \*matched with cases in severe asthma group; <sup>§</sup>calculated from COVID0-19 tested SA and total number of patients with asthma ;

<sup>§</sup>Age, sex, and date of SARS-CoV-2 diagnosis matched comparators

**Table E3. Markers of asthma severity of the included studies (n=12)**

| <b>Author (year)</b>     | <b>Markers of asthma severity</b>                                                                                                                                                                                                                                       |
|--------------------------|-------------------------------------------------------------------------------------------------------------------------------------------------------------------------------------------------------------------------------------------------------------------------|
| Aveyard (2021)           | Patients who were treated with at least three different classes of asthma medication, including <b>ICS</b> , the year prior to cohort entry                                                                                                                             |
| Bloom (2021)             | Patients who were treated with <b>ICS</b> plus LABA plus another maintenance medication                                                                                                                                                                                 |
| Choi (2021)              | Patients who were treated with <b>OCS</b> for a duration of over 90 days (Step 5, GINA guidelines)                                                                                                                                                                      |
| Eger (2020)              | Patients who were treated with <b>high-dose ICS</b> , plus a second controller (and/or systemic corticosteroids) according to ERS/ATS guidelines.                                                                                                                       |
| Fong (2021)              | Patients who were treated with high-dose treatment or continuous/frequent OCS use according to BTS guidelines                                                                                                                                                           |
| Robinson (2021)          | Patients who were treated with (1) asthma biologics (anti-IgE, anti-interleukin-5/interleukin-5 receptor, or anti-interleukin-4 receptor) in the last 1 year or (2) <b>OCS <math>\geq</math> 3 times in the last 12 months</b> , or (3) theophylline in the last 1 year |
| Schultze (2020)          | Patients who were treated with <b>high-dose ICS</b> within 4 months before entering the study cohort                                                                                                                                                                    |
| Williamson (2020)        | Patients who were treated with <b>OCS</b> in the preceding 12 months                                                                                                                                                                                                    |
| Jung (2021)              | Patients who were treated with one of the following medications within 24 months: (1) ICS/LABA + long-acting muscarinic antagonists (LAMAs), (2) ICS/LABA + LTRA, (3) ICS/LABA + xanthine, and (4) <b>corticosteroids for over 90 days</b> .                            |
| <sup>a</sup> Shi (2022)* | Patients who were treated with <b>OCS</b> in the preceding 12 months                                                                                                                                                                                                    |
| <sup>b</sup> Shi (2022)* | Patients who were treated with <b>OCS</b> in the preceding 12 or 24 months                                                                                                                                                                                              |
| Zein (2022)              | Patients who were treated with <b>high-dose ICS</b> equivalent to or exceeding 800 µg/d of budesonide (Step 4 and 5, GINA guidelines)                                                                                                                                   |

Abbreviations: ICS, Inhaled corticosteroids; LABA, Long-acting beta-agonist; OCS, Oral corticosteroids; ERS/ATS, European Respiratory Society (ERS) and American Thoracic Society (ATS); BTS, British Thoracic Society; SIGN, Scottish intercollegiate Guidelines Network; GINA, Global Initiative for Asthma; \* also defined one, two, three or more, or no courses of corticosteroids in the preceding 12 and 24 months.

**Table E4. JBI Quality assessment of included studies (n=12)**

| Study             | Were the two groups similar and recruited from the same population? | Were the exposures measured similarly to assign people to both exposed and unexposed groups? | Was the exposure measured in a valid and reliable way? | Were confounding factors identified? | Were strategies to deal with confounding factors stated? | Were the groups/participants free of the outcome at the start of the study (or at the moment of exposure)? | Were the outcomes measured in a valid and reliable way? | Was the follow up time reported and sufficient to be long enough for outcomes to occur? | Was follow up complete, and if not, were the reasons to loss to follow up described and explored? | Were strategies to address incomplete follow up utilised? | Was appropriate statistical analysis used? | Scoring <sup>§</sup> (%) | Overall Study Quality |
|-------------------|---------------------------------------------------------------------|----------------------------------------------------------------------------------------------|--------------------------------------------------------|--------------------------------------|----------------------------------------------------------|------------------------------------------------------------------------------------------------------------|---------------------------------------------------------|-----------------------------------------------------------------------------------------|---------------------------------------------------------------------------------------------------|-----------------------------------------------------------|--------------------------------------------|--------------------------|-----------------------|
| Aveyard (2021)    | Yes                                                                 | Yes                                                                                          | Yes                                                    | Yes                                  | Yes                                                      | Yes                                                                                                        | Yes                                                     | Yes                                                                                     | Yes                                                                                               | Yes                                                       | Yes                                        | 100                      | High                  |
| Bloom (2021)      | Yes                                                                 | Yes                                                                                          | Yes                                                    | Yes                                  | Yes                                                      | Yes                                                                                                        | Yes                                                     | Yes                                                                                     | Yes                                                                                               | Yes                                                       | Yes                                        | 100                      | High                  |
| Choi (2021)       | Yes                                                                 | Yes                                                                                          | Yes                                                    | Yes                                  | Yes                                                      | Yes                                                                                                        | Yes                                                     | Yes                                                                                     | Unclear                                                                                           | Unclear                                                   | Yes                                        | 81                       | High                  |
| Eger (2020)       | No                                                                  | No                                                                                           | Yes                                                    | Yes                                  | Yes                                                      | Yes                                                                                                        | Yes                                                     | Yes                                                                                     | No                                                                                                | No                                                        | Yes                                        | 63                       | Moderate              |
| Fong (2021)       | Yes                                                                 | Yes                                                                                          | Yes                                                    | Yes                                  | Yes                                                      | Yes                                                                                                        | Yes                                                     | Yes                                                                                     | Yes                                                                                               | Yes                                                       | Yes                                        | 100                      | High                  |
| Robinson (2021)   | Yes                                                                 | Yes                                                                                          | Yes                                                    | Yes                                  | Yes                                                      | Yes                                                                                                        | Yes                                                     | Yes                                                                                     | Unclear                                                                                           | Unclear                                                   | Yes                                        | 81                       | High                  |
| Schultze (2020)   | Yes                                                                 | Yes                                                                                          | Yes                                                    | Yes                                  | Yes                                                      | Yes                                                                                                        | Yes                                                     | Yes                                                                                     | Yes                                                                                               | Yes                                                       | Yes                                        | 100                      | High                  |
| Williamson (2020) | Yes                                                                 | Yes                                                                                          | Yes                                                    | Yes                                  | Yes                                                      | Yes                                                                                                        | Yes                                                     | Yes                                                                                     | Yes                                                                                               | Unclear                                                   | Yes                                        | 91                       | High                  |
| Jung (2021)       | Yes                                                                 | Yes                                                                                          | Yes                                                    | Yes                                  | Yes                                                      | Yes                                                                                                        | Yes                                                     | Yes                                                                                     | No                                                                                                | No                                                        | Yes                                        | 81                       | High                  |
| aShi (2022)       | Yes                                                                 | Yes                                                                                          | Yes                                                    | Yes                                  | Yes                                                      | Yes                                                                                                        | Yes                                                     | Yes                                                                                     | Yes                                                                                               | Unclear                                                   | Yes                                        | 91                       | High                  |
| bShi (2022)       | Yes                                                                 | Yes                                                                                          | Yes                                                    | Yes                                  | Yes                                                      | Yes                                                                                                        | Yes                                                     | Yes                                                                                     | Unclear                                                                                           | Yes                                                       | Yes                                        | 91                       | High                  |
| Zein (2022)       | Yes                                                                 | Yes                                                                                          | Yes                                                    | Yes                                  | Yes                                                      | Yes                                                                                                        | Yes                                                     | Yes                                                                                     | Unclear                                                                                           | Unclear                                                   | Yes                                        | 81                       | High                  |

<sup>§</sup>Scoring scale: high 80 – 100%, moderate 50 – 79%, low <50%

**Table E5. Covariates adjusted in a statistical model for estimates used in this review**

| <b>Author (year)</b> | <b>Covariates</b>                                                                                                                                                                                                                                                                                                                                                                                                                    |
|----------------------|--------------------------------------------------------------------------------------------------------------------------------------------------------------------------------------------------------------------------------------------------------------------------------------------------------------------------------------------------------------------------------------------------------------------------------------|
| Aveyard (2021)       | age, sex, ethnicity, socioeconomic status, region of England, body-mass index (categorical variable), smoking status, non-smoking-related illness (hypertension, type 1 diabetes, chronic liver disease, and chronic neurological disease), smoking-related illness (coronary heart disease, stroke, atrial fibrillation, type 2 diabetes, and chronic kidney disease), and all other respiratory diseases                           |
| Bloom (2021)         | only RT-PCR confirmed cases, age, sex, ethnicity, deprivation, obesity, smoking, chronic cardiac disease, chronic kidney disease, and malignancy                                                                                                                                                                                                                                                                                     |
| Choi (2021)          | age, sex, underlying disease, and asthma medications/severity                                                                                                                                                                                                                                                                                                                                                                        |
| Eger (2020)          | Not available                                                                                                                                                                                                                                                                                                                                                                                                                        |
| Fong (2021)          | age, sex, ethnicity, obesity, other co-morbidities                                                                                                                                                                                                                                                                                                                                                                                   |
| Robinson (2021)      | age, sex, race, ethnicity, payor, smoking status, body mass index, and Charlson comorbidity index.                                                                                                                                                                                                                                                                                                                                   |
| Schultze (2020)      | age, sex, BMI, Indices of multiple deprivations, diagnosed hypertension, heart disease, diabetes, cancer, immunosuppressive conditions, chronic kidney disease, influenza vaccination status, pneumococcal vaccination status, statin use, exacerbation history, oral steroids use                                                                                                                                                   |
| Williamson (2020)    | age, sex, BMI, smoking, Ethnicity, IMD quintile, hypertension or high blood pressure, asthma, chronic heart disease, diabetes, non-haematological cancer, haematological malignancy, reduced kidney function, liver disease, stroke or dementia, other neurological disease, organ transplant, asplenia, rheumatoid arthritis, lupus or psoriasis, and other immunosuppressive condition                                             |
| Jung (2021)          | age, sex, income, obesity, smoking, alcohol consumption, systolic blood pressure, diastolic blood pressure, fasting blood glucose, total cholesterol, CCI scores, number of NSAIDs used, number of steroids used and hypertension, asthma or COPD                                                                                                                                                                                    |
| aShi (2022)          | age, sex, socioeconomic status, nine other risk groups of interest, and number of non-asthma hospital admissions within the 2 years before March 1, 2020.                                                                                                                                                                                                                                                                            |
| bShi (2022)          | age, sex, socioeconomic status, body mass index, number of risk groups of interest, number of non-asthma related hospitalisations within the two-year period prior to March 1, 2020 and vaccine status.                                                                                                                                                                                                                              |
| Zein (2022)          | age, sex, race, ethnicity, body mass index, smoking history, pack-years smoking, medications (nonsteroidal anti-inflammatory drugs, angiotensin converting enzyme 2 inhibitor, angiotensin receptor blocker, and intranasal corticosteroids), comorbidities (allergic rhinitis, diabetes, hypertension, coronary artery disease, heart failure, cancer [historical or current], and immunosuppressive disease), and month of testing |

**Figure E1. Adjusted odds ratios (aORs) for hospitalisation for COVID-19**

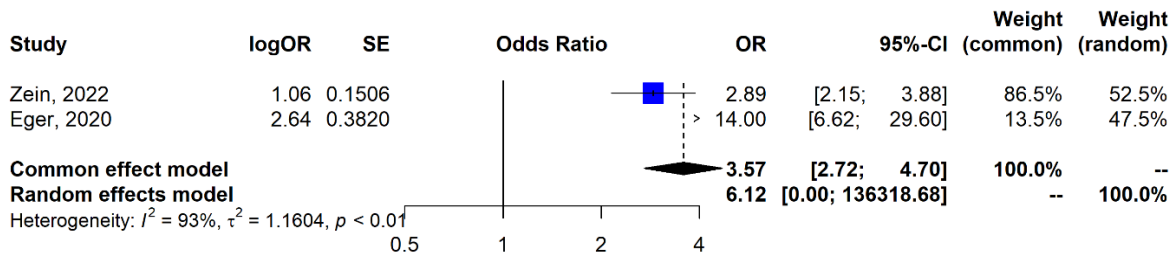

**Figure E2. Adjusted odds ratios (aORs) for mortality for COVID-19**

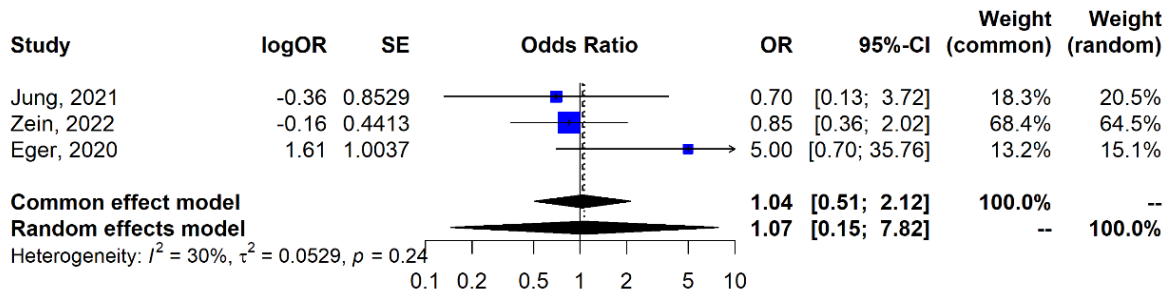

**Figure E3. Adjusted odds ratios (aORs) for ICU admission for COVID-19**

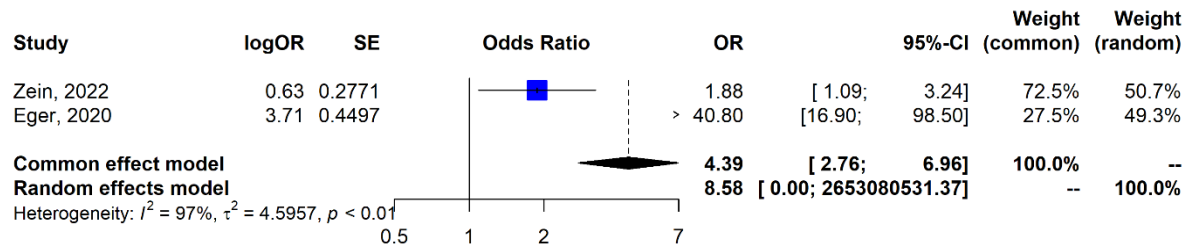

Supplement: ERR-0066-2022.SUPPLEMENT.pdf [file ERR-0066-2022.SUPPLEMENT.pdf]
